# Supplementary material
Source: publisher figshare collection journal article supplement (https://acs.figshare.com/ndownloader/files/25360677)
Supplement: Supplementary file 1 [file 25360677]

## Supporting Information

### **Directed evolution of the nonribosomal peptide synthetase BpsA to enable recognition by the human phosphopantetheinyl transferase for counter-screening antibiotic candidates**

Alistair S. Brown<sup>1,2,3</sup>, Jack A. Sissons<sup>1</sup>, Jeremy G. Owen<sup>1,2,3</sup>, David F. Ackerley<sup>1,2,3\*</sup>

#### **Author affiliations:**

1. School of Biological Sciences, Victoria University of Wellington, Wellington 6012, New Zealand
2. Centre for Biodiscovery, School of Biological Sciences, Victoria University of Wellington, Wellington 6012, New Zealand
3. Maurice Wilkins Centre for Molecular Biodiscovery, New Zealand

**\* Correspondence to:** david.ackerley@vuw.ac.nz

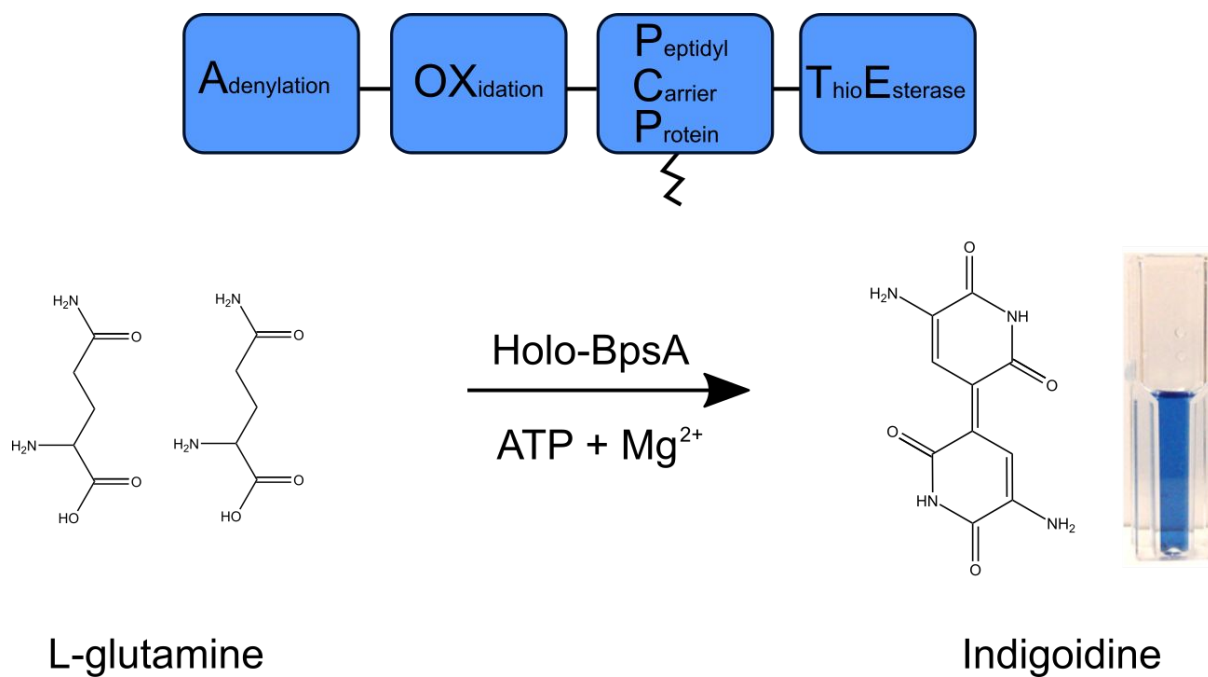

**Figure S1:** BpsA is a single module NRPS (domain structure above) that cyclizes a single molecule of L-glutamine in an ATP powered reaction. Two cyclized glutamines then dimerize to form the vibrant blue pigment indigoidine (fully solubilised in DMSO in the image).

A)

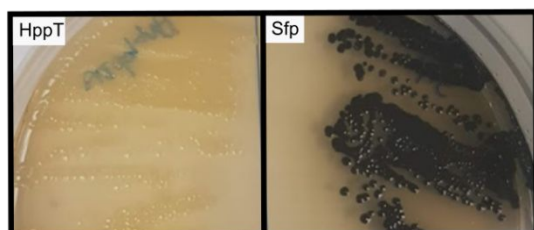

B)

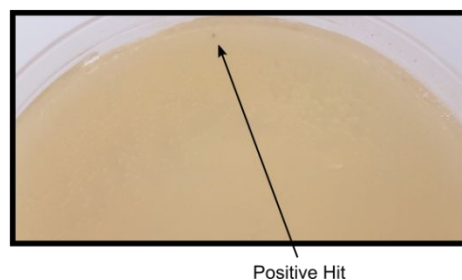

**Figure S2:** A) Indigoidine production by *E. coli*  $\Delta$  *entD* BL21 co-expressing *bpsA* and either hPPTase (“HppT”) or *sfp* (“Sfp”), plated on pigment production agar. The photo was taken 24 hours post induction with IPTG. B) A representative positive ‘hit’ from a screening plate approximately eight hours post-induction.

| Consensus | P | F | V | A | P | R | T | E | T | E | K | E | I | A | A | V | W | E | K | A | L | R | R | E | N | A | S | V | Q | D | D | F | F | E | S | G | G | N | S | L | I | A | V | G | L | V | R | E | L | N | A | R | L | G | V | S | L | P | L | Q | S | V | L | E | S | P | T | I | E | K | L | A | R | R | L | E | R | E | V | A | Q |   |
|-----------|---|---|---|---|---|---|---|---|---|---|---|---|---|---|---|---|---|---|---|---|---|---|---|---|---|---|---|---|---|---|---|---|---|---|---|---|---|---|---|---|---|---|---|---|---|---|---|---|---|---|---|---|---|---|---|---|---|---|---|---|---|---|---|---|---|---|---|---|---|---|---|---|---|---|---|---|---|---|---|---|---|---|
| WT_BpsA   | P | F | V | A | P | R | T | E | T | E | K | E | I | A | A | V | W | E | K | A | L | R | R | E | N | A | S | V | Q | D | D | F | F | E | S | G | G | N | S | L | I | A | V | G | L | V | R | E | L | N | A | R | L | G | V | S | L | P | L | Q | S | V | L | E | S | P | T | I | E | K | L | A | R | R | L | E | R | E | V | A | Q |   |
| Mut_11    | P | F | V | A | P | R | T | E | T | E | K | E | I | A | A | V | W | E | K | A | L | R | R | E | N | A | S | V | Q | D | D | F | F | E | S | G | G | N | S | L | I | A | V | G | L | V | R | E | L | N | A | R | L | G | V | S | L | P | L | Q | S | V | L | E | S | P | T | I | E | K | L | A | R | R | L | E | R | E | V | A | Q |   |
| Mut_2     | P | F | V | A | P | R | T | E | T | E | K | E | I | A | A | V | W | E | K | A | L | R | R | E | N | A | S | V | Q | D | D | F | F | E | S | G | G | N | S | L | I | A | V | G | L | V | R | E | L | N | A | R | L | G | V | S | L | P | L | Q | S | V | L | E | S | P | T | I | E | K | L | A | R | R | L | E | R | E | V | A | Q |   |
| Mut_31    | P | F | V | A | P | R | T | E | T | E | K | E | I | A | A | V | W | E | K | A | L | R | R | E | N | A | S | V | Q | D | D | F | F | E | S | G | G | N | S | L | I | A | V | G | L | V | R | E | L | N | A | R | L | G | V | S | L | P | L | Q | S | V | L | E | S | P | T | I | E | K | L | A | R | R | L | E | R | E | V | A | Q |   |
| Mut_34    | P | F | V | A | P | R | T | E | T | E | K | E | I | A | A | V | W | E | K | A | L | R | R | E | N | A | S | V | Q | D | D | F | F | E | S | G | G | N | S | L | I | A | V | G | L | V | R | E | L | N | A | R | L | G | V | S | L | P | L | Q | S | V | L | E | S | P | T | I | E | K | L | A | R | R | L | E | R | E | V | A | Q |   |
| Mut_36    | P | F | V | A | P | R | T | E | T | E | K | E | I | A | A | V | W | E | K | A | L | R | R | E | N | A | S | V | Q | D | D | F | F | E | S | G | G | N | S | L | I | A | V | G | L | V | R | E | L | N | A | R | L | G | V | S | L | P | L | Q | S | V | L | E | S | P | T | I | E | K | L | A | R | R | L | E | R | E | V | A | Q |   |
| Mut_35    | P | F | V | A | P | R | T | E | T | E | K | E | I | A | A | V | W | E | K | A | L | R | R | E | N | A | S | V | Q | D | D | F | F | E | S | G | G | N | S | L | I | A | V | G | L | V | R | E | L | N | A | R | L | G | V | S | L | P | L | Q | S | V | L | E | S | P | T | I | E | K | L | A | R | R | L | E | R | E | V | A | Q |   |
| Mut_48    | P | F | V | A | P | R | T | E | T | E | K | E | I | A | A | V | W | E | K | A | L | R | R | E | N | A | S | V | Q | D | D | F | F | E | S | G | G | N | S | L | I | A | V | G | L | V | R | E | L | N | A | R | L | G | V | S | L | P | L | Q | S | V | L | E | S | P | T | I | E | K | L | A | R | R | L | E | R | E | V | A | Q |   |
| Mut_21    | P | F | V | A | P | R | T | E | T | E | K | E | I | A | A | V | W | E | K | A | L | R | R | E | N | A | S | V | Q | D | D | F | F | E | S | G | G | N | S | L | I | A | V | G | L | V | R | E | L | N | A | R | L | G | V | S | L | P | L | Q | S | V | L | E | S | P | T | I | E | K | L | A | R | R | L | E | R | E | V | A | Q |   |
| Mut_4     | P | F | V | A | P | R | T | E | T | E | K | E | I | A | A | V | W | E | K | A | L | R | R | E | N | A | S | V | Q | D | D | F | F | E | S | G | G | N | S | L | I | A | V | G | L | V | R | E | L | N | A | R | L | G | V | S | L | P | L | Q | S | V | L | E | S | P | T | I | E | K | L | A | R | R | L | E | R | E | V | A | Q |   |
| Mut_1     | P | F | V | A | P | R | T | E | T | E | K | E | I | A | A | V | W | E | K | A | L | R | R | E | N | A | S | V | Q | D | D | F | F | E | S | G | G | N | S | L | I | A | V | G | L | V | R | E | L | N | A | R | L | G | V | S | L | P | L | Q | S | V | L | E | S | P | T | I | E | K | L | A | R | R | L | E | R | E | V | A | Q |   |
| Mut_46    | P | F | V | A | P | R | T | E | T | E | K | E | I | A | A | V | W | E | K | A | L | R | R | E | N | A | S | V | Q | D | D | F | F | E | S | G | G | N | S | L | I | A | V | G | L | V | R | E | L | N | A | R | L | G | V | S | L | P | L | Q | S | V | L | E | S | P | T | I | E | K | L | A | R | R | L | E | R | E | V | A | Q |   |
| Mut_24    | P | F | V | A | P | R | T | E | T | E | K | E | I | A | A | V | W | E | K | A | L | R | R | E | N | A | S | V | Q | D | D | F | F | E | S | G | G | N | S | L | I | A | V | G | L | V | R | E | L | N | A | R | L | G | V | S | L | P | L | Q | S | V | L | E | S | P | T | I | E | K | L | A | R | R | L | E | R | E | V | A | Q |   |
| Mut_52    | P | F | V | A | P | R | T | E | T | E | K | E | I | A | A | V | W | E | K | A | L | R | R | E | N | A | S | V | Q | D | D | F | F | E | S | G | G | N | S | L | I | A | V | G | L | V | R | E | L | N | A | R | L | G | V | S | L | P | L | Q | S | V | L | E | S | P | T | I | E | K | L | A | R | R | L | E | R | E | V | A | Q |   |
| Mut_50    | P | F | V | A | P | R | T | E | T | E | K | E | I | A | A | V | W | E | K | A | L | R | R | E | N | A | S | V | Q | D | D | F | F | E | S | G | G | N | S | L | I | A | V | G | L | V | R | E | L | N | A | R | L | G | V | S | L | P | L | Q | S | V | L | E | S | P | T | I | E | K | L | A | R | R | L | E | R | E | V | A | Q |   |
| Mut_22    | P | F | V | A | P | R | T | E | T | E | K | E | I | A | A | V | W | E | K | A | L | R | R | E | N | A | S | V | Q | D | D | F | F | E | S | G | G | N | S | L | I | A | V | G | L | V | R | E | L | N | A | R | L | G | V | S | L | P | L | Q | S | V | L | E | S | P | T | I | E | K | L | A | R | R | L | E | R | E | V | A | Q |   |
| Mut_27    | P | F | V | A | P | R | T | E | T | E | K | E | I | A | A | V | W | E | K | A | L | R | R | E | N | A | S | V | Q | D | D | F | F | E | S | G | G | N | S | L | I | A | V | G | L | V | R | E | L | N | A | R | L | G | V | S | L | P | L | Q | S | V | L | E | S | P | T | I | E | K | L | A | R | R | L | E | R | E | V | A | Q |   |
| Mut_43    | P | F | V | A | P | R | T | E | T | E | K | E | I | A | A | V | W | E | K | A | L | R | R | E | N | A | S | V | Q | D | D | F | F | E | S | G | G | N | S | L | I | A | V | G | L | V | R | E | L | N | A | R | L | G | V | S | L | P | L | Q | S | V | L | E | S | P | T | I | E | K | L | A | R | R | L | E | R | E | V | A | Q |   |
| Mut_51    | P | F | V | A | P | R | T | E | T | E | K | E | I | A | A | V | W | E | K | A | L | R | R | E | N | A | S | V | Q | D | D | F | F | E | S | G | G | N | S | L | I | A | V | G | L | V | R | E | L | N | A | R | L | G | V | S | L | P | L | Q | S | V | L | E | S | P | T | I | E | K | L | A | R | R | L | E | R | E | V | A | Q |   |
| Mut_29    | P | F | V | A | P | R | T | E | T | E | K | E | I | A | A | V | W | E | K | A | L | R | R | E | N | A | S | V | Q | D | D | F | F | E | S | G | G | N | S | L | I | A | V | G | L | V | R | E | L | N | A | R | L | G | V | S | L | P | L | Q | S | V | L | E | S | P | T | I | E | K | L | A | R | R | L | E | R | E | V | A | Q |   |
| Mut_33    | P | F | V | A | P | R | T | E | T | E | K | E | I | A | A | V | W | E | K | A | L | R | R | E | N | A | S | V | Q | D | D | F | F | E | S | G | G | N | S | L | I | A | V | G | L | V | R | E | L | N | A | R | L | G | V | S | L | P | L | Q | S | V | L | E | S | P | T | I | E | K | L | A | R | R | L | E | R | E | V | A | Q |   |
| Mut_17    | P | F | V | A | P | R | T | E | T | E | K | E | I | A | A | V | W | E | K | A | L | R | R | E | N | A | S | V | Q | D | D | F | F | E | S | G | G | N | S | L | I | A | V | G | L | V | R | E | L | N | A | R | L | G | V | S | L | P | L | Q | S | V | L | E | S | P | T | I | E | K | L | A | R | R | L | E | R | E | V | A | Q |   |
| Mut_45    | P | F | V | A | P | R | T | E | T | E | K | E | I | A | A | V | W | E | K | A | L | R | R | E | N | A | S | V | Q | D | D | F | F | E | S | G | G | N | S | L | I | A | V | G | L | V | R | E | L | N | A | R | L | G | V | S | L | P | L | Q | S | V | L | E | S | P | T | I | E | K | L | A | R | R | L | E | R | E | V | A | Q |   |
| Mut_47    | L | P | F | V | A | P | R | T | E | T | E | K | E | I | A | A | V | W | E | K | A | L | R | R | E | N | A | S | V | Q | D | D | F | F | E | S | G | G | N | S | L | I | A | V | G | L | V | R | E | L | N | A | R | L | G | V | S | L | P | L | Q | S | V | L | E | S | P | T | I | E | K | L | A | R | R | L | E | R | E | V | A | Q |
| Mut_44    | P | F | V | A | P | R | T | E | T | E | K | E | I | A | A | V | W | E | K | A | L | R | R | E | N | A | S | V | Q | D | D | F | F | E | S | G | G | N | S | L | I | A | V | G | L | V | R | E | L | N | A | R | L | G | V | S | L | P | L | Q | S | V | L | E | S | P | T | I | E | K | L | A | R | R | L | E | R | E | V | A | Q |   |
| Mut_42    | P | F | V | A | P | R | T | E | T | E | K | E | I | A | A | V | W | E | K | A | L | R | R | E | N | A | S | V | Q | D | D | F | F | E | S | G | G | N | S | L | I | A | V | G | L | V | R | E | L | N | A | R | L | G | V | S | L | P | L | Q | S | V | L | E | S | P | T | I | E | K | L | A | R | R | L | E | R | E | V | A | Q |   |
| Mut_39    | P | F | V | A | P | R | T | E | T | E | K | E | I | A | A | V | W | E | K | A | L | R | R | E | N | A | S | V | Q | D | D | F | F | E | S | G | G | N | S | L | I | A | V | G | L | V | R | E | L | N | A | R | L | G | V | S | L | P | L | Q | S | V | L | E | S | P | T | I | E | K | L | A | R | R | L | E | R | E | V | A | Q |   |
| Mut_41    | P | F | V | A | P | R | T | E | T | E | K | E | I | A | A | V | W | E | K | A | L | R | R | E | N | A | S | V | Q | D | D | F | F | E | S | G | G | N | S | L | I | A | V | G | L | V | R | E | L | N | A | R | L | G | V | S | L | P | L | Q | S | V | L | E | S | P | T | I | E | K | L | A | R | R | L | E | R | E | V | A | Q |   |
| Mut_30    | P | F | V | A | P | R | T | E | T | E | K | E | I | A | A | V | W | E | K | A | L | R | R | E | N | A | S |   |   |   |   |   |   |   |   |   |   |   |   |   |   |   |   |   |   |   |   |   |   |   |   |   |   |   |   |   |   |   |   |   |   |   |   |   |   |   |   |   |   |   |   |   |   |   |   |   |   |   |   |   |   |   |

A)

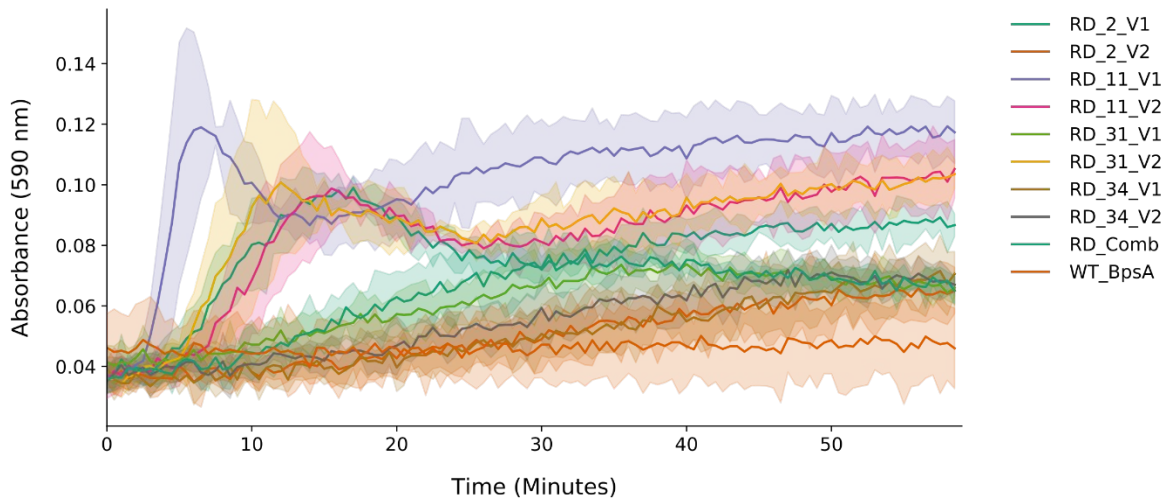

B)

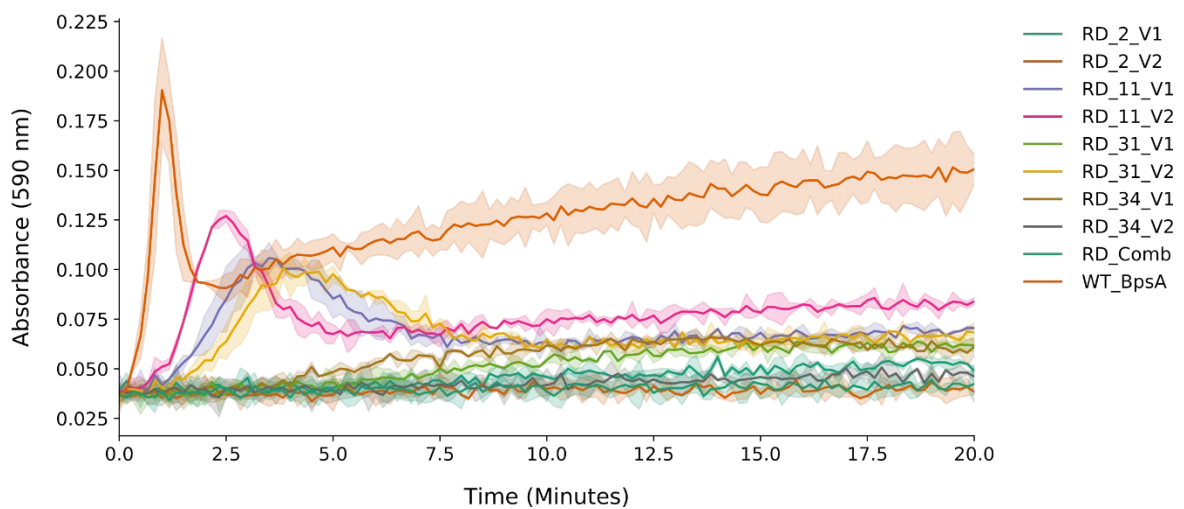

**Figure S4:** A) Raw  $A_{590}$  values, monitoring indigoidine synthesis by the nine second generation variants and wild type BpsA (WT\_BpsA) during real-time activation by hPPTase. Data is the average of three replicates and the lighter shaded boundary represents one standard deviation. B) Raw  $A_{590}$  values for the nine second generation variants and WT\_BpsA following their pre-activation by Sfp. Data is the average of three replicates and the lighter shaded boundary represents one standard deviation.

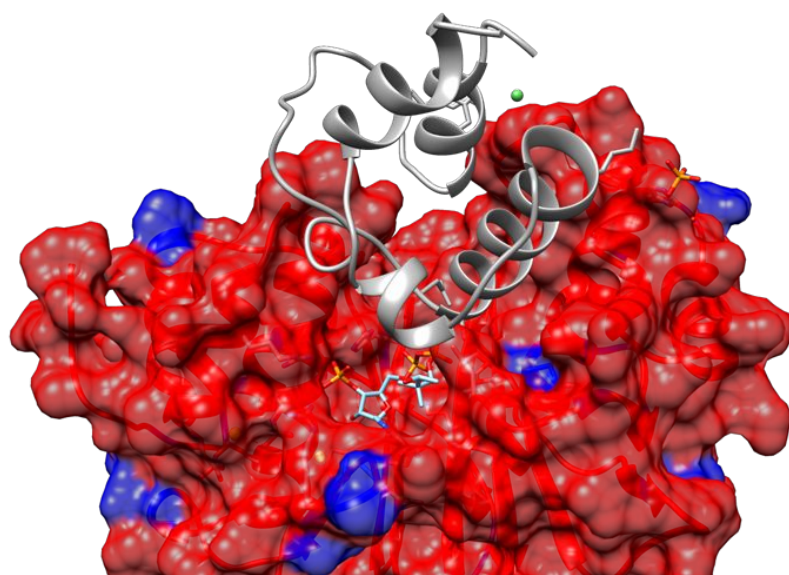

**Figure S5:** A model of rPPTase was built using the SWISS-MODEL homology server with the hPPTase (PDB:1CG5) as a template. The rPPTase model and 1CG5 were aligned in UCSF Chimera using the matchmaker function and differences were coloured in blue. The ACP domain is displayed as a ribbon in grey.

A)

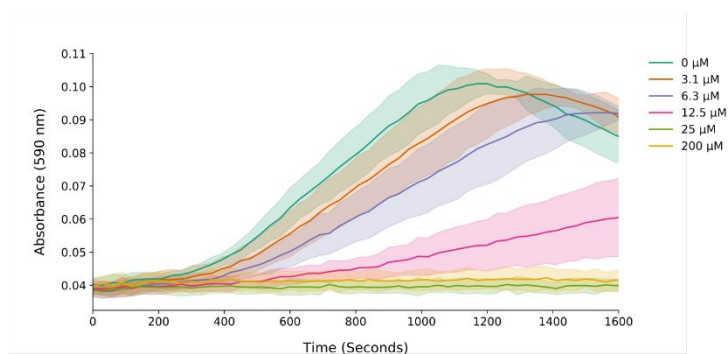

B)

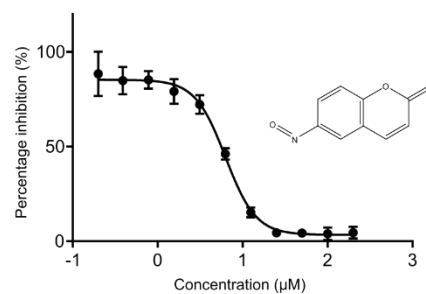

**Figure S6: A)** The rate of activation of RD\_11\_V1 by rPPTase is diminished in the presence of increasing concentrations of 6-NOBP, a broad spectrum PPTase inhibitor. Data was recorded every 30 s and is the average of three replicates. The lighter shaded boundaries represent one standard deviation. For clarity, not all concentrations of 6-NOBP that were used to derive the hPPTase EC<sub>50</sub> are represented here. **B)** Graph used to derive EC<sub>50</sub> values for rPPTase inhibition by 6-NOBP. Data is the average of three replicates and the error bars represent one standard deviation. The structure of 6-NOBP is inset in the graph

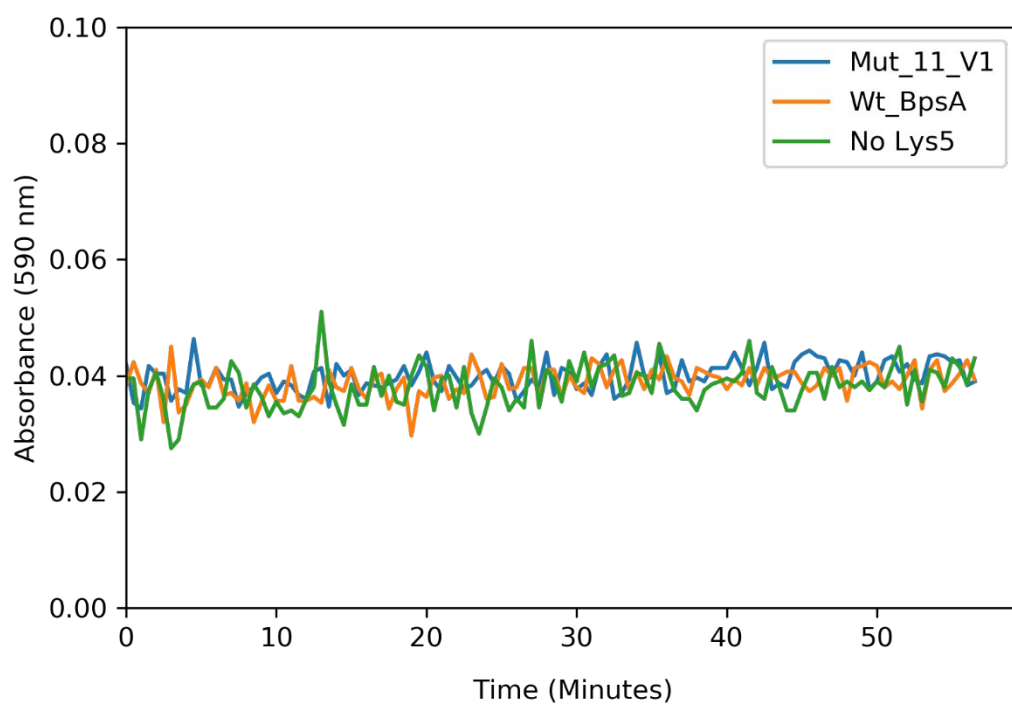

**Figure S7:** Raw  $A_{590}$  values for *apo*-RD\_11\_V1 and *apo*-Wt\_BpsA incubated with Lys\_5 and everything required for the synthesis of indigoidine. No\_Lys5 is a negative control, identical to the other reactions but lacking Lys\_5. Data are the averages of three technical replicates.
